# Supplementary material
Source: PubMed Central journal article supplement (PMC4775377)
Supplement: NIHMS745455-supplement-supplement_1.pdf [file NIHMS745455-supplement-supplement_1.pdf]

1 **Supplementary Material Hardy-Weinberg Equilibrium**

2

3

4 Briefly, in the case of a single locus with two alleles (A and S) where  $p$  is the allele frequency of the dominant

5 allele,  $q$  is the frequency of the recessive allele (HbA and HbS respectively in the present study) and  $p+q=1$ ,

6 genotype frequencies assuming HWE are equivalent to  $p^2$  for homozygous dominants (AA),  $2pq$  for

7 heterozygotes (AS),  $q^2$  for homozygous recessives (SS) and  $p^2+2pq+q^2=1$  (Equation 1). Considering a three-

8 allele case (for example HbA, HbS and HbC), the corresponding equation is  $p^2+2pq+q^2+2pr+r^2+2qr=1$

9 (Equation 2) where  $r$  is the third allele (i.e.  $r^2$ ,  $2pr$  and  $2qr$  are CC, AC and SC proportions respectively).

10

11 **Equation 1:**  $p^2 + 2pq + q^2 = 1$

12 *where  $p$  and  $q$  are the proportions of the two alleles (e.g. HbA and HbS).*

13

14 **Equation 2:**  $p^2 + 2pq + q^2 + 2pr + r^2 + 2qr = 1$

15 *where  $p$ ,  $q$  and  $r$  are the proportions of the three alleles (HbA, HbS and HbC).*

16 For each study population, we calculated the expected genotype frequencies based on these equations

17 (Table 1). Radar charts, created with a slightly modified version of the radarchart function included in the

18 “fmsb” package in R (see code in the Supplementary Information), are used to illustrate the relative

19 differences between observed and expected genotype counts for selected studies (Figure 2).

20

## Supplementary Table 1

| ID | Bibliographic citation                                                                                                                                                                                                                                   | Source              |
|----|----------------------------------------------------------------------------------------------------------------------------------------------------------------------------------------------------------------------------------------------------------|---------------------|
| 1  | Aebischer ML, Martorana MC, Costa F, et al. Evaluation of the sensitivity of microfilter paper assays in an anthropological study: results of samples from Cameroon and Tanzania. <i>Anthropologischer Anzeiger</i> . 1990;48(1):15-23.                  | Pubmed              |
| 2  | Agasa B, Bosunga K, Opara A, et al. Prevalence of sickle cell disease in a northeastern region of the Democratic Republic of Congo: what impact on transfusion policy? <i>Transfusion Medicine</i> . 2010;20(1):62-65.                                   | Pubmed              |
| 3  | Al Arrayed S. Campaign to control genetic blood diseases in Bahrain. <i>Community Genetics</i> . 2005;8(1):52-55.                                                                                                                                        | Pubmed              |
| 4  | Al Arrayed S, Al Hajeri A. Newborn screening services in Bahrain between 1985 and 2010. <i>Advances in Hematology</i> . 2012:903219.                                                                                                                     | Pubmed              |
| 5  | Al Hosani H, Salah M, Osman HM, Farag HM, Anvery SM. Incidence of haemoglobinopathies detected through neonatal screening in the United Arab Emirates. <i>Eastern Mediterranean Health Journal</i> . 2005;11(3):300-307.                                 | Pubmed              |
| 6  | Al Hosani H, Salah M, Osman HM, et al. Expanding the comprehensive national neonatal screening programme in the United Arab Emirates from 1995 to 2011. <i>Eastern Mediterranean Health Journal</i> . 2014;20(1):17-23.                                  | Pubmed              |
| 7  | Al-Awamy BH, Al-Muzan M, Al-Turki M, Serjeant GR. Neonatal screening for sickle cell disease in the Eastern Province of Saudi Arabia. <i>Transactions of the Royal Society of Tropical Medicine and Hygiene</i> . 1984;78(6):792-794.                    | Pubmed              |
| 8  | Alkindi S, Al Zadjali S, Al Madhani A, et al. Forecasting hemoglobinopathy burden through neonatal screening in Omani neonates. <i>Hemoglobin</i> . 2010;34(2):135-144.                                                                                  | Pubmed              |
| 9  | Al-Nood H, Al-Ismael S, King L, May A. Prevalence of the sickle cell gene in Yemen: a pilot study. <i>Hemoglobin</i> . 2004;28(4):305-315.                                                                                                               | Pubmed              |
| 10 | Diallo DA. Sickle cell disease in Africa: current situation and strategies for improving the quality and duration of survival. <i>Bulletin of the Académie Nationale de Médecine</i> . 2008;7:1361-1373. Complemented by <i>Personal Communication</i> . | Preliminary studies |
| 11 | Fattoum S. [Hemoglobinopathies in Tunisia. An updated review of the epidemiologic and molecular data]. <i>Tunisie Medicale</i> . 2006;84(11):687-696.                                                                                                    | Pubmed              |
| 12 | Hajer S, Neila T, Sondess HF, et al. A lower-cost protocol for sickle cell disease neonatal screening in Tunisia. <i>Annals of Saudi Medicine</i> . 2012;32(1):49-52.                                                                                    | Pubmed              |
| 13 | Kafando E, Sawadogo M, Cotton F, Vertongen F, Gulbis B. Neonatal screening for sickle cell disorders in Ouagadougou, Burkina Faso: a pilot study. <i>Journal of Medical Screening</i> . 2005;12(3):112-114.                                              | Pubmed              |
| 14 | Khoriaty E, Halaby R, Berro M, Sweid A, Abbas HA, Inati A. Incidence of sickle cell disease and other hemoglobin variants in 10,095 lebanese neonates. <i>Public Library of Science One</i> . 2014;9(9):e105109.                                         | Pubmed              |
| 15 | Kulkarni AG, Jekeme SD. Cord blood screening for haemoglobinopathies in northern Nigeria. <i>Annals of Tropical Medicine and Parasitology</i> . 1986;80(5):549-551.                                                                                      | Pubmed              |
| 16 | Lallemant M, Galacteros F, Lallemant-Lecoeur S, et al. Hemoglobin abnormalities. An evaluation on new-born infants and their mothers in a maternity unit close to Brazzaville (P.R. Congo). <i>Human Genetics</i> . 1986;74(1):54-58.                    | Preliminary studies |
| 17 | Le Hesran JY, Personne I, Personne P, et al. Longitudinal study of Plasmodium falciparum infection and immune responses in infants with or without the sickle cell trait. <i>International Journal of Epidemiology</i> . 1999;28(4):793-798.             | Preliminary studies |
| 18 | Mbodj M, Ndoye O, Diarra M, et al. [Sickle cell disease neonatal screening. First evaluation]. <i>Dakar Medical</i> . 2003;48(3):202-205.                                                                                                                | Pubmed              |
| 19 | McGann PT, Ferris MG, Ramamurthy U, et al. A prospective newborn screening and treatment program for sickle cell anemia in Luanda, Angola. <i>American Journal of Hematology</i> . 2013;88(12):984-989.                                                  | Pubmed              |
| 20 | Mohammed AM, Al-Hilli F, Nadkarni KV, Bhagwat GP, Bapat JP. Hemoglobinopathies and glucose-6-phosphate dehydrogenase deficiency in hospital births in Bahrain. <i>Annals of Saudi Medicine</i> . 1992;12(6):536-539.                                     | Pubmed              |

|    |                                                                                                                                                                                                                                                                    |                     |
|----|--------------------------------------------------------------------------------------------------------------------------------------------------------------------------------------------------------------------------------------------------------------------|---------------------|
| 21 | Moreno JL, Baribwira C. The epidemiology of neonatal sickle-cell-anemia in Bujumbura (Burundi). <i>Annales de Pédiatrie</i> . 1994;41(4):215-218.                                                                                                                  | Preliminary studies |
| 22 | Munyanganizi R, Cotton F, Vertongen F, Gulbis B. Red blood cell disorders in Rwandese neonates: screening for sickle cell disease and glucose-6-phosphate dehydrogenase deficiency. <i>Journal of Medical Screening</i> . 2006;13(3):129-131.                      | Pubmed              |
| 23 | Mutesa L, Boemer F, Ngendahayo L, et al. Neonatal screening for sickle cell disease in Central Africa: a study of 1825 newborns with a new enzyme-linked immunosorbent assay test. <i>Journal of Medical Screening</i> . 2007;14(3):113-116.                       | Pubmed              |
| 24 | Nasserullah Z, Alshammari A, Abbas MA, et al. Regional experience with newborn screening for sickle cell disease, other hemoglobinopathies and G6PD deficiency. <i>Annals of Saudi Medicine</i> . 2003;23(6):354-357.                                              | Pubmed              |
| 25 | North ML, Piffaut MC, Duwig I, Locoh-Donou AG, Locoh-Donou AM. Detection of haemoglobinopathies at birth in Togo. <i>Nouvelle Revue Française d'Hématologie</i> . 1988;30(4):237-241.                                                                              | Pubmed              |
| 26 | Odunvbun ME, Okolo AA, Rahimy CM. Newborn screening for sickle cell disease in a Nigerian hospital. <i>Public Health</i> . 2008;122(10):1111-1116.                                                                                                                 | Pubmed              |
| 27 | Ohene-Frempong K, Oduro J, Tetteh H, Nkrumah F. Screening newborns for sickle cell disease in Ghana. <i>Pediatrics</i> . 2008;121(Supplement 2):S120-S121. Complemented by <i>Personal Communication</i> .                                                         | Pubmed              |
| 28 | Oudart JL, Diadihou F, Sarrat H, Satge P. [Hemoglobin of the African newborn infant. Results of an investigation in Senegal]. <i>Annales de Pédiatrie</i> . 1968;15(12):773-781.                                                                                   | Pubmed              |
| 29 | Richard-Lenoble D, Toublanc JE, Zinsou RD, Kombila M, Carme B. [Results of a systematic study of drepanocytosis in 1,500 Gabonese using hemoglobin electrophoresis]. <i>Bulletin de la Société de Pathologie Exotique et de Ses Filiales</i> . 1980;73(2):200-206. | Pubmed              |
| 30 | Segbena AY, Kueviakoe I, Messie AK, Napo-Koura IG, Vovor A, David M. [Hemoglobin anomalies at the university hospital center in Lome, Togo]. <i>Médecine Tropicale</i> . 2002;62(1):51-54.                                                                         | Pubmed              |
| 31 | Talafih K, Hunaiti AA, Gharaibeh N, Gharaibeh M, Jaradat S. The prevalence of hemoglobin S and glucose-6-phosphate dehydrogenase deficiency in Jordanian newborn. <i>Journal of Obstetrics and Gynaecology Research</i> . 1996;22(5):417-420.                      | Pubmed              |
| 32 | Tchamago CJ. Dépistage néonatal de la drépanocytose au Sénégal. Etude préliminaire au de de deux maternités de Dakar.: Faculté de Médecine, de Pharmacie et d'Odonto-Stomatologie, Université Cheikh Anta Diop; 2006.                                              | Preliminary studies |
| 33 | Tshilolo L, Aissi LM, Lukusa D, et al. Neonatal screening for sickle cell anaemia in the Democratic Republic of the Congo: experience from a pioneer project on 31 204 newborns. <i>Journal of Clinical Pathology</i> . 2009;62(1):35-38.                          | Pubmed              |
| 34 | Tshilolo L, Kafando E, Sawadogo M, et al. Neonatal screening and clinical care programmes for sickle cell disorders in sub-Saharan Africa: lessons from pilot studies. <i>Public Health</i> . 2008;122(9):933-941.                                                 | Pubmed              |
| 35 | Van Baelen H, Vandepitte J, Cornu G, Eeckels R. Routine detection of sickle-cell anaemia and haemoglobin Bart's in Congolese neonates. <i>Tropical and Geographical Medicine</i> . 1969;21(4):412-426.                                                             | Pubmed              |
| 36 | Williams TN, Uyoga S, Macharia A, et al. Bacteraemia in Kenyan children with sickle-cell anaemia: a retrospective cohort and case-control study. <i>Lancet</i> . 2009;374(9698):1364-1370. Complemented by <i>Personal Communication</i> .                         | Preliminary studies |

Supplementary Table 2

| ID                        | First Author                 | Year        | Country             | N             | Diagnostic method      | Genotype counts |              |            |           |          |          | Allele frequency |              |               |
|---------------------------|------------------------------|-------------|---------------------|---------------|------------------------|-----------------|--------------|------------|-----------|----------|----------|------------------|--------------|---------------|
|                           |                              |             |                     |               |                        | AA              | AS           | SS         | AC        | SC       | CC       | A                | S            | C             |
| <b>Sub-Saharan Africa</b> |                              |             |                     |               |                        |                 |              |            |           |          |          |                  |              |               |
| 1                         | McGann                       | 2013        | Angola              | 36,453        | IEF                    | 28,209          | 7,666        | 550        | 21        | 7        | 0        | 0.879            | 0.120        | 0.0004        |
| 2                         | Kafando                      | 2005        | Burkina Faso        | 2,341         | IEF                    | 1,702           | 171          | 14         | 395       | 27       | 32       | 0.848            | 0.048        | 0.1038        |
| 3                         | Moreno                       | 1994        | Burundi             | 260           | IEF                    | 238             | 22           | 0          | /         | /        | /        | 0.958            | 0.042        | /             |
| 4                         | Moreno                       | 1994        | Burundi             | 82            | IEF                    | 60              | 20           | 2          | /         | /        | /        | 0.854            | 0.146        | /             |
| 5                         | Moreno                       | 1994        | Burundi             | 40            | IEF                    | 32              | 8            | 0          | /         | /        | /        | 0.900            | 0.100        | /             |
|                           | <b>Moreno</b>                | <b>1994</b> | <b>Burundi</b>      | <b>382</b>    | <b>IEF</b>             | <b>330</b>      | <b>50</b>    | <b>2</b>   | <b>/</b>  | <b>/</b> | <b>/</b> | <b>0.929</b>     | <b>0.071</b> | <b>/</b>      |
| 6                         | Mutesa                       | 2007        | Burundi             | 637           | ELISA                  | 608             | 28           | 1          | 0         | 0        | 0        | 0.976            | 0.024        | 0.0000        |
| 7                         | Le Hesran                    | 1999        | Cameroon            | 156           | Electrophoresis        | 118             | 34           | 4          | /         | /        | /        | 0.865            | 0.135        | /             |
| 8                         | Diallo                       | 2008        | Congo               | 1,186         | IEF                    | 952             | 225          | 9          | /         | /        | /        | 0.898            | 0.102        | /             |
| 9                         | Van Baelen                   | 1969        | DRC                 | 500           | Electrophoresis        | 367             | 120          | 13         | /         | /        | /        | 0.854            | 0.146        | /             |
| 10                        | Lallemant                    | 1986        | DRC                 | 146           | IEF                    | 118             | 27           | 1          | /         | /        | /        | 0.901            | 0.099        | /             |
| 11                        | Mutesa                       | 2007        | DRC                 | 84            | ELISA                  | 78              | 4            | 0          | 2         | 0        | 0        | 0.964            | 0.024        | 0.0119        |
| 12                        | Tshilolo                     | 2008        | DRC                 | 4,116         | IEF                    | 3,182           | 838          | 96         | 0         | 0        | 0        | 0.875            | 0.125        | 0.0000        |
| 13                        | Tshilolo                     | 2009        | DRC                 | 70            | IEF                    | 64              | 6            | 0          | 0         | 0        | 0        | 0.957            | 0.043        | 0.0000        |
| 14                        | Tshilolo                     | 2009        | DRC                 | 579           | IEF                    | 473             | 100          | 6          | 0         | 0        | 0        | 0.903            | 0.097        | 0.0000        |
| 15                        | Tshilolo                     | 2009        | DRC                 | 717           | IEF                    | 609             | 102          | 6          | 0         | 0        | 0        | 0.921            | 0.079        | 0.0000        |
| 16                        | Tshilolo                     | 2009        | DRC                 | 559           | IEF                    | 440             | 110          | 9          | 0         | 0        | 0        | 0.886            | 0.114        | 0.0000        |
| 17                        | Tshilolo                     | 2009        | DRC                 | 932           | IEF                    | 791             | 130          | 11         | 0         | 0        | 0        | 0.918            | 0.082        | 0.0000        |
| 18                        | Tshilolo                     | 2009        | DRC                 | 1,016         | IEF                    | 819             | 179          | 18         | 0         | 0        | 0        | 0.894            | 0.106        | 0.0000        |
| 19                        | Tshilolo                     | 2009        | DRC                 | 3,069         | IEF                    | 2,491           | 527          | 51         | 0         | 0        | 0        | 0.898            | 0.102        | 0.0000        |
| 20                        | Tshilolo                     | 2009        | DRC                 | 4,217         | IEF                    | 3,449           | 713          | 55         | 0         | 0        | 0        | 0.902            | 0.098        | 0.0000        |
| 21                        | Tshilolo                     | 2009        | DRC                 | 10,445        | IEF                    | 8,554           | 1,756        | 135        | 0         | 0        | 0        | 0.903            | 0.097        | 0.0000        |
| 22                        | Tshilolo                     | 2009        | DRC                 | 9,600         | IEF                    | 7,810           | 1,653        | 137        | 0         | 0        | 0        | 0.900            | 0.100        | 0.0000        |
|                           | <b>Tshilolo<sup>z</sup></b>  | <b>2009</b> | <b>DRC</b>          | <b>31,204</b> | <b>IEF</b>             | <b>25,500</b>   | <b>5,276</b> | <b>428</b> | <b>0</b>  | <b>0</b> | <b>0</b> | <b>0.902</b>     | <b>0.098</b> | <b>0.0000</b> |
| 23                        | Agasa                        | 2010        | DRC                 | 520           | IEF                    | 394             | 121          | 5          | /         | /        | /        | 0.874            | 0.126        | /             |
| 24                        | Richard-Lenoble              | 1980        | Gabon               | 96            | Electrophoresis        | 86              | 8            | 2          | /         | /        | /        | 0.938            | 0.063        | /             |
| 25                        | Ohene-Frempong               | Pers.com.   | Ghana               | 343,355       | IEF                    | 259,660         | 45,812       | 3,186      | 30,253    | 2,807    | 1,637    | 0.867            | 0.080        | 0.0529        |
| 26                        | Williams                     | Pers.com.   | Kenya               | 15,444        | PCR                    | 12,984          | 2,335        | 125        | /         | /        | /        | 0.916            | 0.084        | /             |
| 27                        | Diallo                       | 2008        | Mali                | 1,029         | IEF                    | 807             | 102          | 4          | 105       | 4        | 7        | 0.885            | 0.055        | 0.0598        |
| 28                        | Kulkarni                     | 1986        | Nigeria             | 700           | Electrophoresis        | 526             | 138          | 20         | 15        | 0        | 1        | 0.861            | 0.127        | 0.0121        |
| 29                        | Odunvbun                     | 2008        | Nigeria             | 644           | IEF                    | 485             | 133          | 18         | 7         | 1        | 0        | 0.862            | 0.132        | 0.0062        |
| 30                        | Munyanganizi                 | 2006        | Rwanda              | 987           | IEF                    | 960             | 27           | 0          | 0         | 0        | 0        | 0.986            | 0.014        | 0.0000        |
| 31                        | Mutesa                       | 2007        | Rwanda              | 1,104         | ELISA                  | 1,073           | 28           | 1          | 2         | 0        | 0        | 0.986            | 0.014        | 0.0009        |
| 32                        | Oudart                       | 1968        | Senegal             | 345           | Electrophoresis        | 313             | 25           | 1          | 4         | 2        | 0        | 0.949            | 0.042        | 0.0087        |
| 33                        | Mbodji                       | 2003        | Senegal             | 479           | IEF                    | 426             | 38           | 9          | 5         | 1        | 0        | 0.934            | 0.059        | 0.0063        |
| 34                        | Tchamago                     | 2006        | Senegal             | 944           | IEF                    | 839             | 90           | 4          | 9         | 0        | 0        | 0.941            | 0.052        | 0.0048        |
| 35                        | Diallo                       | 2008        | Senegal             | 1,000         | IEF                    | 910             | 85           | 5          | 0         | 0        | 0        | 0.953            | 0.048        | 0.0000        |
| 36                        | Aebischer                    | 1990        | Tanzania            | 92            | Electrophoresis        | 82              | 10           | 0          | /         | /        | /        | 0.946            | 0.054        | /             |
| 37                        | Aebischer                    | 1990        | Tanzania            | 101           | Electrophoresis        | 87              | 13           | 1          | /         | /        | /        | 0.926            | 0.074        | /             |
| 38                        | Aebischer                    | 1990        | Tanzania            | 30            | Electrophoresis        | 29              | 1            | 0          | /         | /        | /        | 0.983            | 0.017        | /             |
|                           | <b>Aebischer<sup>z</sup></b> | <b>1990</b> | <b>Tanzania</b>     | <b>223</b>    | <b>Electrophoresis</b> | <b>198</b>      | <b>24</b>    | <b>1</b>   | <b>/</b>  | <b>/</b> | <b>/</b> | <b>0.942</b>     | <b>0.058</b> | <b>/</b>      |
| 39                        | North                        | 1988        | Togo                |               | IEF                    | 269             | 72           | 4          | 34        | 5        | 1        | 0.836            | 0.110        | 0.0532        |
| 40                        | Segbena                      | 2002        | Togo                | 171           | IEF                    | 110             | 28           | 2          | 27        | 4        | 0        | 0.804            | 0.105        | 0.0906        |
| <b>North Africa</b>       |                              |             |                     |               |                        |                 |              |            |           |          |          |                  |              |               |
| 41                        | Diallo                       | 2008        | Tunisia             | 1,329         | IEF                    | 1,309           | 20           | 0          | 0         | 0        | 0        | 0.992            | 0.008        | 0.0000        |
| 42                        | Fattoum                      | 2006        | Tunisia             | 2,029         | IEF                    | 1,968           | 44           | 0          | 17        | 0        | 0        | 0.985            | 0.011        | 0.0042        |
| 43                        | Fattoum                      | 2006        | Tunisia             | 335           | IEF                    | 332             | 2            | 0          | 1         | 0        | 0        | 0.996            | 0.003        | 0.0015        |
| 44                        | Fattoum                      | 2006        | Tunisia             | 264           | IEF                    | 249             | 15           | 0          | 0         | 0        | 0        | 0.972            | 0.028        | 0.0000        |
|                           | <b>Fattoum<sup>z</sup></b>   | <b>2006</b> | <b>Tunisia</b>      | <b>2,628</b>  | <b>IEF</b>             | <b>2,549</b>    | <b>61</b>    | <b>0</b>   | <b>18</b> | <b>0</b> | <b>0</b> | <b>0.985</b>     | <b>0.012</b> | <b>0.0034</b> |
| 45                        | Hajer                        | 2012        | Tunisia             | 9,148         | IEF                    | 8,935           | 176          | 0          | 34        | 1        | 2        | 0.988            | 0.010        | 0.0021        |
| <b>Middle East</b>        |                              |             |                     |               |                        |                 |              |            |           |          |          |                  |              |               |
| 46                        | Mohammed                     | 1992        | Bahrain             | 10,327        | Electrophoresis        | 8,954           | 1,157        | 217        | 0         | 0        | 0        | 0.923            | 0.077        | 0.0000        |
| 47                        | Al Arrayed                   | 2005        | Bahrain             | 1,995         | HPLC                   | 1,652           | 325          | 18         | /         | /        | /        | 0.910            | 0.090        | /             |
| 48                        | Al Arrayed                   | 2012        | Bahrain             | 38,940        | HPLC                   | 33,512          | 5,247        | 228        | /         | /        | /        | 0.928            | 0.073        | /             |
| 49                        | Talafih                      | 1996        | Jordan              | 181           | Electrophoresis        | 172             | 9            | 0          | /         | /        | /        | 0.975            | 0.025        | /             |
| 50                        | Khoriaty                     | 2014        | Lebanon             | 10,095        | HPLC                   | 9,911           | 168          | 10         | 5         | 1        | 0        | 0.990            | 0.009        | 0.0003        |
| 51                        | Alkindi                      | 2010        | Oman                | 7,837         | HPLC                   | 7,406           | 409          | 22         | /         | /        | /        | 0.971            | 0.029        | /             |
| 52                        | Al-Awamy                     | 1984        | Saudi Arabia        | 1,697         | Electrophoresis        | 1,612           | 75           | 10         | /         | /        | /        | 0.972            | 0.028        | /             |
| 53                        | Al-Awamy                     | 1984        | Saudi Arabia        | 2,800         | Electrophoresis        | 2,597           | 188          | 15         | /         | /        | /        | 0.961            | 0.039        | /             |
| 54                        | Al-Awamy                     | 1984        | Saudi Arabia        | 1,124         | Electrophoresis        | 900             | 202          | 22         | /         | /        | /        | 0.891            | 0.109        | /             |
|                           | <b>Al-Awamy<sup>z</sup></b>  | <b>1984</b> | <b>Saudi Arabia</b> | <b>5,621</b>  | <b>Electrophoresis</b> | <b>5,109</b>    | <b>465</b>   | <b>47</b>  | <b>/</b>  | <b>/</b> | <b>/</b> | <b>0.950</b>     | <b>0.050</b> | <b>/</b>      |

| ID | First Author                   | Year        | Country             | N             | Diagnostic method      | Genotype counts |              |            |           |          |          | Allele frequency |              |               |
|----|--------------------------------|-------------|---------------------|---------------|------------------------|-----------------|--------------|------------|-----------|----------|----------|------------------|--------------|---------------|
|    |                                |             |                     |               |                        | AA              | AS           | SS         | AC        | SC       | CC       | A                | S            | C             |
| 55 | Nasserullah                    | 2003        | Saudi Arabia        | 2,149         | Electrophoresis        | 2,096           | 51           | 2          | /         | /        | /        | 0.987            | 0.013        | /             |
| 56 | Nasserullah                    | 2003        | Saudi Arabia        | 21,829        | Electrophoresis        | 16,645          | 4,621        | 563        | /         | /        | /        | 0.868            | 0.132        | /             |
|    | <b>Nasserullah<sup>z</sup></b> | <b>2003</b> | <b>Saudi Arabia</b> | <b>23,978</b> | <b>Electrophoresis</b> | <b>18,741</b>   | <b>4,672</b> | <b>565</b> | <b>/</b>  | <b>/</b> | <b>/</b> | <b>0.879</b>     | <b>0.121</b> | <b>/</b>      |
| 57 | Al Hosani                      | 2005        | UAE                 | 9,165         | HPLC                   | 9,019           | 137          | 6          | 3         | 0        | 0        | 0.992            | 0.008        | 0.0002        |
| 58 | Al Hosani                      | 2005        | UAE                 | 13,035        | HPLC                   | 12,920          | 103          | 3          | 8         | 0        | 1        | 0.995            | 0.004        | 0.0004        |
|    | <b>Al Hosani<sup>z</sup></b>   | <b>2005</b> | <b>UAE</b>          | <b>22,200</b> | <b>HPLC</b>            | <b>21,939</b>   | <b>240</b>   | <b>9</b>   | <b>11</b> | <b>0</b> | <b>1</b> | <b>0.994</b>     | <b>0.006</b> | <b>0.0003</b> |
| 59 | Al Hosani                      | 2014        | UAE                 | 542,286       | HPLC                   | 537,494         | 4,509        | 203        | 69        | 0        | 11       | 0.995            | 0.005        | 0.0001        |
| 60 | Al-Nood                        | 2004        | Yemen               | 1,500         | HPLC                   | 1,467           | 33           | 0          | 0         | 0        | 0        | 0.989            | 0.011        | 0.0000        |

Supplementary Table 3

| ID                        | Reference                   | Study period          | Country        | N             | Observed    |             |            |            |            |            | Expected (HWE) |             |            |            |            |            | Exact test     | $F_{IS}$ (%) |
|---------------------------|-----------------------------|-----------------------|----------------|---------------|-------------|-------------|------------|------------|------------|------------|----------------|-------------|------------|------------|------------|------------|----------------|--------------|
|                           |                             |                       |                |               | %AA         | %AS         | %SS        | %AC        | %SC        | %CC        | %AA            | %AS         | %SS        | %AC        | %SC        | %CC        |                |              |
| <b>Sub-Saharan Africa</b> |                             |                       |                |               |             |             |            |            |            |            |                |             |            |            |            |            |                |              |
| 1                         | McGann et al, 2013          | Jul 2011 - Jun 2013   | Angola         | 36,453        | 77.4        | 21.0        | 1.5        | 0.1        | 0.0        | 0.0        | 77.3           | 21.2        | 1.4        | 0.1        | 0.0        | 0.0        | 0.103          | 0.6          |
| 2                         | Kafando et al, 2005         | 2000, 2003, 2004      | Burkina Faso   | 2,341         | 72.7        | 7.3         | 0.6        | 16.9       | 1.2        | 1.4        | 71.9           | 8.2         | 0.2        | 17.6       | 1.0        | 1.1        | 0.002 *        | 5.5          |
| 3                         | Moreno et al, 1994          | Not specified         | Burundi        | 260           | 91.5        | 8.5         | 0.0        | /          | /          | /          | 91.7           | 8.1         | 0.2        | /          | /          | /          | 0.696          | -4.4         |
| 4                         | Moreno et al, 1994          | Not specified         | Burundi        | 82            | 73.2        | 24.4        | 2.4        | /          | /          | /          | 72.9           | 25.0        | 2.1        | /          | /          | /          | 1.000          | 2.4          |
| 5                         | Moreno et al, 1994          | Not specified         | Burundi        | 40            | 80.0        | 20.0        | 0.0        | /          | /          | /          | 81.0           | 18.0        | 1.0        | /          | /          | /          | 0.712          | -11.1        |
|                           | <b>Moreno et al, 1994</b>   | <b>Not specified</b>  | <b>Burundi</b> | <b>382</b>    | <b>86.4</b> | <b>13.1</b> | <b>0.5</b> | <b>/</b>   | <b>/</b>   | <b>/</b>   | <b>86.4</b>    | <b>13.1</b> | <b>0.5</b> | <b>/</b>   | <b>/</b>   | <b>/</b>   | <b>1.000</b>   | <b>0.4</b>   |
| 6                         | Mutesa et al, 2007          | Jul 2004 - Jul 2006   | Burundi        | 637           | 95.4        | 4.4         | 0.2        | 0.0        | 0.0        | 0.0        | 95.3           | 4.6         | 0.1        | 0.0        | 0.0        | 0.0        | 0.295          | 4.4          |
| 7                         | Le Hesran et al, 1999       | Jan 1993 - Dec 1995   | Cameroon       | 156           | 75.6        | 21.8        | 2.6        | /          | /          | /          | 74.9           | 23.3        | 1.8        | /          | /          | /          | 0.484          | 6.5          |
| 8                         | Diallo et al, 2008          | Feb 2005 - Mar 2005   | Congo          | 1,186         | 80.3        | 19.0        | 0.8        | /          | /          | /          | 80.6           | 18.4        | 1.0        | /          | /          | /          | 0.281          | -3.2         |
| 9                         | Van Baelen et al, 1969      | Nov 1964 - Apr 1965   | DRC            | 500           | 73.4        | 24.0        | 2.6        | /          | /          | /          | 72.9           | 24.9        | 2.1        | /          | /          | /          | 0.471          | 3.8          |
| 10                        | Lallemant et al, 1986       | Not specified         | DRC            | 146           | 80.8        | 18.5        | 0.7        | /          | /          | /          | 81.1           | 17.9        | 1.0        | /          | /          | /          | 1.000          | -3.4         |
| 11                        | Mutesa et al, 2007          | Jul 2004 - Jul 2006   | DRC            | 84            | 92.9        | 4.8         | 0.0        | 2.4        | 0.0        | 0.0        | 93.0           | 4.6         | 0.1        | 2.3        | 0.1        | 0.0        | 1.000          | -2.9         |
| 12                        | Tshilolo et al, 2008        | Oct 2000 - Aug 2002   | DRC            | 4,116         | 77.3        | 20.4        | 2.3        | 0.0        | 0.0        | 0.0        | 76.5           | 21.9        | 1.6        | 0.0        | 0.0        | 0.0        | 0.000 *        | 7.0          |
| 13                        | Tshilolo et al, 2009        | Jan 2006 - ?          | DRC            | 70            | 91.4        | 8.6         | 0.0        | 0.0        | 0.0        | 0.0        | 91.6           | 8.2         | 0.2        | 0.0        | 0.0        | 0.0        | 1.000          | -4.5         |
| 14                        | Tshilolo et al, 2009        | Jan 2006 - ?          | DRC            | 579           | 81.7        | 17.3        | 1.0        | 0.0        | 0.0        | 0.0        | 81.6           | 17.5        | 0.9        | 0.0        | 0.0        | 0.0        | 0.810          | 1.2          |
| 15                        | Tshilolo et al, 2009        | Jan 2006 - ?          | DRC            | 717           | 84.9        | 14.2        | 0.8        | 0.0        | 0.0        | 0.0        | 84.7           | 14.6        | 0.6        | 0.0        | 0.0        | 0.0        | 0.610          | 2.8          |
| 16                        | Tshilolo et al, 2009        | Jan 2006 - ?          | DRC            | 559           | 78.7        | 19.7        | 1.6        | 0.0        | 0.0        | 0.0        | 78.4           | 20.3        | 1.3        | 0.0        | 0.0        | 0.0        | 0.528          | 3.0          |
| 17                        | Tshilolo et al, 2009        | Jan 2006 - ?          | DRC            | 932           | 84.9        | 13.9        | 1.2        | 0.0        | 0.0        | 0.0        | 84.4           | 15.0        | 0.7        | 0.0        | 0.0        | 0.0        | 0.078          | 6.9          |
| 18                        | Tshilolo et al, 2009        | Jan 2006 - ?          | DRC            | 1,016         | 80.6        | 17.6        | 1.8        | 0.0        | 0.0        | 0.0        | 80.0           | 18.9        | 1.1        | 0.0        | 0.0        | 0.0        | 0.044 *        | 6.9          |
| 19                        | Tshilolo et al, 2009        | Jan 2006 - ?          | DRC            | 3,069         | 81.2        | 17.2        | 1.7        | 0.0        | 0.0        | 0.0        | 80.6           | 18.4        | 1.1        | 0.0        | 0.0        | 0.0        | 0.001 *        | 6.7          |
| 20                        | Tshilolo et al, 2009        | Jan 2006 - ?          | DRC            | 4,217         | 81.8        | 16.9        | 1.3        | 0.0        | 0.0        | 0.0        | 81.4           | 17.6        | 1.0        | 0.0        | 0.0        | 0.0        | 0.014 *        | 4.0          |
| 21                        | Tshilolo et al, 2009        | Jan 2006 - ?          | DRC            | 10,445        | 81.9        | 16.8        | 1.3        | 0.0        | 0.0        | 0.0        | 81.5           | 17.5        | 0.9        | 0.0        | 0.0        | 0.0        | 0.000 *        | 4.0          |
| 22                        | Tshilolo et al, 2009        | Jan 2006 - ?          | DRC            | 9,600         | 81.4        | 17.2        | 1.4        | 0.0        | 0.0        | 0.0        | 80.9           | 18.1        | 1.0        | 0.0        | 0.0        | 0.0        | 0.000 *        | 4.6          |
|                           | <b>Tshilolo et al, 2009</b> | <b>Jan 2006 - ?</b>   | <b>DRC</b>     | <b>31,204</b> | <b>81.7</b> | <b>16.9</b> | <b>1.4</b> | <b>0.0</b> | <b>0.0</b> | <b>0.0</b> | <b>81.3</b>    | <b>17.7</b> | <b>1.0</b> | <b>0.0</b> | <b>0.0</b> | <b>0.0</b> | <b>0.000 *</b> | <b>4.6</b>   |
| 23                        | Agasa et al, 2010           | Dec 2006 - Feb 2007   | DRC            | 520           | 75.8        | 23.3        | 1.0        | /          | /          | /          | 76.4           | 22.0        | 1.6        | /          | /          | /          | 0.236          | -5.7         |
| 24                        | Richard-Lenoble et al, 1980 | Not specified         | Gabon          | 96            | 89.6        | 8.3         | 2.1        | /          | /          | /          | 87.9           | 11.7        | 0.4        | /          | /          | /          | 0.037 *        | 28.9         |
| 25                        | Ohene-Frempong (Pers.com.)  | Feb 1995 - Dec 2011   | Ghana          | 343,355       | 75.6        | 13.3        | 0.9        | 8.8        | 0.8        | 0.5        | 75.2           | 13.9        | 0.6        | 9.2        | 0.8        | 0.3        | 0.000 *        | 3.9          |
| 26                        | Williams (Pers. Com.)       | May 2006 - May 2014   | Kenya          | 15,444        | 84.1        | 15.1        | 0.8        | /          | /          | /          | 84.0           | 15.3        | 0.7        | /          | /          | /          | 0.093          | 1.4          |
| 27                        | Diallo et al, 2008          | Feb 2005 - Apr 2005   | Mali           | 1,029         | 78.4        | 9.9         | 0.4        | 10.2       | 0.4        | 0.7        | 78.3           | 9.8         | 0.3        | 10.6       | 0.7        | 0.4        | 0.263          | 2.5          |
| 28                        | Kulkarni et al, 1986        | Not specified         | Nigeria        | 700           | 75.1        | 19.7        | 2.9        | 2.1        | 0.0        | 0.1        | 74.1           | 21.9        | 1.6        | 2.1        | 0.3        | 0.0        | 0.001 *        | 10.0         |
| 29                        | Odunvbun et al, 2008        | Jun 2000 - Sep 2000   | Nigeria        | 644           | 75.3        | 20.7        | 2.8        | 1.1        | 0.2        | 0.0        | 74.3           | 22.7        | 1.7        | 1.1        | 0.2        | 0.0        | 0.094          | 8.7          |
| 30                        | Munyanganizi et al, 2006    | 2005                  | Rwanda         | 987           | 97.3        | 2.7         | 0.0        | 0.0        | 0.0        | 0.0        | 97.3           | 2.7         | 0.0        | 0.0        | 0.0        | 0.0        | 1.000          | -1.4         |
| 31                        | Mutesa et al, 2007          | July 2004 - July 2006 | Rwanda         | 1,104         | 97.2        | 2.5         | 0.1        | 0.2        | 0.0        | 0.0        | 97.1           | 2.7         | 0.0        | 0.2        | 0.0        | 0.0        | 0.204          | 5.0          |
| 32                        | Oudart et al, 1968          | Not specified         | Senegal        | 345           | 90.7        | 7.2         | 0.3        | 1.2        | 0.6        | 0.0        | 90.1           | 8.0         | 0.2        | 1.7        | 0.1        | 0.0        | 0.061          | 7.4          |

| ID                  | Reference                      | Study period               | Country             | N             | Observed    |             |            |            |            |            | Expected (HWE) |             |            |            |            |            | Exact test     | $F_{IS}$ (%) |
|---------------------|--------------------------------|----------------------------|---------------------|---------------|-------------|-------------|------------|------------|------------|------------|----------------|-------------|------------|------------|------------|------------|----------------|--------------|
|                     |                                |                            |                     |               | %AA         | %AS         | %SS        | %AC        | %SC        | %CC        | %AA            | %AS         | %SS        | %AC        | %SC        | %CC        |                |              |
| 33                  | Mbodji et al, 2003             | Oct 1996 - Jun 1997        | Senegal             | 479           | 88.9        | 7.9         | 1.9        | 1.0        | 0.2        | 0.0        | 87.3           | 11.1        | 0.4        | 1.2        | 0.1        | 0.0        | 0.000 *        | 25.7         |
| 34                  | Tchamago et al, 2006           | Mar 2005 - Aug 2005        | Senegal             | 944           | 88.9        | 9.5         | 0.4        | 1.0        | 0.0        | 0.0        | 88.6           | 9.8         | 0.3        | 0.9        | 0.0        | 0.0        | 0.513          | 5.9          |
| 35                  | Diallo et al, 2008             | Not specified              | Senegal             | 1,000         | 91.0        | 8.5         | 0.5        | 0.0        | 0.0        | 0.0        | 90.7           | 9.0         | 0.2        | 0.0        | 0.0        | 0.0        | 0.163          | 6.1          |
| 36                  | Aebischer et al, 1990          | Not specified              | Tanzania            | 92            | 89.1        | 10.9        | 0.0        | /          | /          | /          | 89.4           | 10.3        | 0.3        | /          | /          | /          | 1.000          | -5.7         |
| 37                  | Aebischer et al, 1990          | Not specified              | Tanzania            | 101           | 86.1        | 12.9        | 1.0        | /          | /          | /          | 85.7           | 13.7        | 0.6        | /          | /          | /          | 1.000          | 6.4          |
| 38                  | Aebischer et al, 1990          | Not specified              | Tanzania            | 30            | 96.7        | 3.3         | 0.0        | /          | /          | /          | 96.7           | 3.3         | 0.0        | /          | /          | /          | 1.000          | -1.7         |
|                     | <b>Aebischer et al, 1990</b>   | <b>Not specified</b>       | <b>Tanzania</b>     | <b>223</b>    | <b>88.8</b> | <b>10.8</b> | <b>0.4</b> | <b>/</b>   | <b>/</b>   | <b>/</b>   | <b>88.7</b>    | <b>11.0</b> | <b>0.3</b> | <b>/</b>   | <b>/</b>   | <b>/</b>   | <b>1.000</b>   | <b>2.0</b>   |
| 39                  | North et al, 1988              | Not specified              | Togo                | 385           | 69.9        | 18.7        | 1.0        | 8.8        | 1.3        | 0.3        | 70.0           | 18.5        | 1.2        | 8.9        | 1.2        | 0.3        | 0.970          | -1.0         |
| 40                  | Segbena et al, 2002            | Not specified              | Togo                | 171           | 64.3        | 16.4        | 1.2        | 15.8       | 2.3        | 0.0        | 64.7           | 16.9        | 1.1        | 14.6       | 1.9        | 0.8        | 0.485          | -3.3         |
| <b>North Africa</b> |                                |                            |                     |               |             |             |            |            |            |            |                |             |            |            |            |            |                |              |
| 41                  | Diallo et al, 2005             | Not specified              | Tunisia             | 1,329         | 98.5        | 1.5         | 0.0        | 0.0        | 0.0        | 0.0        | 98.5           | 1.5         | 0.0        | 0.0        | 0.0        | 0.0        | 1.000          | -0.8         |
| 42                  | Fattoum et al, 2006            | Not specified              | Tunisia             | 2,029         | 97.0        | 2.2         | 0.0        | 0.8        | 0.0        | 0.0        | 97.0           | 2.1         | 0.0        | 0.8        | 0.0        | 0.0        | 1.000          | -1.2         |
| 43                  | Fattoum et al, 2006            | Not specified              | Tunisia             | 335           | 99.1        | 0.6         | 0.0        | 0.3        | 0.0        | 0.0        | 99.1           | 0.6         | 0.0        | 0.3        | 0.0        | 0.0        | 1.000          | -0.3         |
| 44                  | Fattoum et al, 2006            | Not specified              | Tunisia             | 264           | 94.3        | 5.7         | 0.0        | 0.0        | 0.0        | 0.0        | 94.4           | 5.5         | 0.1        | 0.0        | 0.0        | 0.0        | 1.000          | -2.9         |
|                     | <b>Fattoum et al, 2006</b>     | <b>Not specified</b>       | <b>Tunisia</b>      | <b>2,628</b>  | <b>97.0</b> | <b>2.3</b>  | <b>0.0</b> | <b>0.7</b> | <b>0.0</b> | <b>0.0</b> | <b>97.0</b>    | <b>2.3</b>  | <b>0.0</b> | <b>0.7</b> | <b>0.0</b> | <b>0.0</b> | <b>1.000</b>   | <b>-1.3</b>  |
| 45                  | Hajer et al, 2012              | Not specified              | Tunisia             | 9,148         | 97.7        | 1.9         | 0.0        | 0.4        | 0.0        | 0.0        | 97.7           | 1.9         | 0.0        | 0.4        | 0.0        | 0.0        | 0.000 *        | 1.3          |
| <b>Middle East</b>  |                                |                            |                     |               |             |             |            |            |            |            |                |             |            |            |            |            |                |              |
| 46                  | Mohammed et al, 1992           | Oct 1984 - Dec 1985        | Bahrain             | 10,327        | 86.7        | 11.2        | 2.1        | 0.0        | 0.0        | 0.0        | 85.2           | 14.2        | 0.6        | 0.0        | 0.0        | 0.0        | 0.000 *        | 21.2         |
| 47                  | Al Arrayed et al, 2005         | Feb 2002 - April 2002      | Bahrain             | 1,995         | 82.8        | 16.3        | 0.9        | /          | /          | /          | 82.7           | 16.5        | 0.8        | /          | /          | /          | 0.682          | 1.0          |
| 48                  | Al Arrayed et al, 2012         | Jan 2008 - Dec 2010        | Bahrain             | 38,940        | 86.1        | 13.5        | 0.6        | /          | /          | /          | 86.1           | 13.6        | 0.5        | /          | /          | /          | 0.156          | -0.9         |
| 49                  | Talafih et al, 1996            | Not specified              | Jordan              | 181           | 95.0        | 5.0         | 0.0        | /          | /          | /          | 95.1           | 4.8         | 0.1        | /          | /          | /          | 1.000          | -2.5         |
| 50                  | Khoriaty et al, 2014           | Dec 2010 - Mar 2013        | Lebanon             | 10,095        | 98.2        | 1.7         | 0.1        | 0.0        | 0.0        | 0.0        | 98.1           | 1.9         | 0.0        | 0.1        | 0.0        | 0.0        | 0.000 *        | 9.9          |
| 51                  | Alkindi et al, 2010            | Apr 2005 - Mar 2007        | Oman                | 7,837         | 94.5        | 5.2         | 0.3        | /          | /          | /          | 94.3           | 5.6         | 0.1        | /          | /          | /          | 0.000 *        | 7.0          |
| 52                  | Al-Awamy et al, 1984           | Dec 1981 - Apr 1983        | Saudi Arabia        | 1,697         | 95.0        | 4.4         | 0.6        | /          | /          | /          | 94.5           | 5.4         | 0.1        | /          | /          | /          | 0.000 *        | 18.8         |
| 53                  | Al-Awamy et al, 1984           | Dec 1981 - Apr 1983        | Saudi Arabia        | 2,800         | 92.8        | 6.7         | 0.5        | /          | /          | /          | 92.4           | 7.5         | 0.2        | /          | /          | /          | 0.000 *        | 10.3         |
| 54                  | Al-Awamy et al, 1984           | Mar 1982 - Apr             | Saudi Arabia        | 1,124         | 80.1        | 18.0        | 2.0        | /          | /          | /          | 79.3           | 19.5        | 1.2        | /          | /          | /          | 0.021 *        | 7.8          |
|                     | <b>Al-Awamy et al, 1984</b>    | <b>Dec 1981 - Apr 1983</b> | <b>Saudi Arabia</b> | <b>5,621</b>  | <b>90.9</b> | <b>8.3</b>  | <b>0.8</b> | <b>/</b>   | <b>/</b>   | <b>/</b>   | <b>90.3</b>    | <b>9.5</b>  | <b>0.2</b> | <b>/</b>   | <b>/</b>   | <b>/</b>   | <b>0.000 *</b> | <b>12.5</b>  |
| 55                  | Nasserullah et al, 2003        | Dec 1992 - Dec 2001        | Saudi Arabia        | 2,149         | 97.5        | 2.4         | 0.1        | /          | /          | /          | 97.5           | 2.5         | 0.0        | /          | /          | /          | 0.046 *        | 6.1          |
| 56                  | Nasserullah et al, 2003        | Dec 1992 - Dec 2001        | Saudi Arabia        | 21,829        | 76.3        | 21.2        | 2.6        | /          | /          | /          | 75.4           | 22.9        | 1.7        | /          | /          | /          | 0.000 *        | 7.4          |
|                     | <b>Nasserullah et al, 2003</b> | <b>Dec 1992 - Dec 2001</b> | <b>Saudi Arabia</b> | <b>23,978</b> | <b>78.2</b> | <b>19.5</b> | <b>2.4</b> | <b>/</b>   | <b>/</b>   | <b>/</b>   | <b>77.3</b>    | <b>21.3</b> | <b>1.5</b> | <b>/</b>   | <b>/</b>   | <b>/</b>   | <b>0.000 *</b> | <b>8.4</b>   |
| 57                  | Al Hosani et al, 2005          | Jan 2002 - Dec 2002        | UAE                 | 9,165         | 98.4        | 1.5         | 0.1        | 0.0        | 0.0        | 0.0        | 98.3           | 1.6         | 0.0        | 0.0        | 0.0        | 0.0        | 0.000 *        | 7.1          |
| 58                  | Al Hosani et al, 2005          | Jan 2002 - Dec 2002        | UAE                 | 13,035        | 99.1        | 0.8         | 0.0        | 0.1        | 0.0        | 0.0        | 99.1           | 0.8         | 0.0        | 0.1        | 0.0        | 0.0        | 0.000 *        | 6.3          |
|                     | <b>Al Hosani et al, 2005</b>   | <b>Jan 2002 - Dec 2002</b> | <b>UAE</b>          | <b>22,200</b> | <b>98.8</b> | <b>1.1</b>  | <b>0.0</b> | <b>0.0</b> | <b>0.0</b> | <b>0.0</b> | <b>98.8</b>    | <b>1.2</b>  | <b>0.0</b> | <b>0.1</b> | <b>0.0</b> | <b>0.0</b> | <b>0.000 *</b> | <b>6.8</b>   |
| 59                  | Al Hosani et al, 2014          | Jan 2002 - Dec 2011        | UAE                 | 542,286       | 99.1        | 0.8         | 0.0        | 0.0        | 0.0        | 0.0        | 99.1           | 0.9         | 0.0        | 0.0        | 0.0        | 0.0        | 0.000 *        | 8.1          |
| 60                  | Al-Nood et al, 2004            | July 2001 - Dec 2001       | Yemen               | 1,500         | 97.8        | 2.2         | 0.0        | 0.0        | 0.0        | 0.0        | 97.8           | 2.2         | 0.0        | 0.0        | 0.0        | 0.0        | 1.000          | -1.1         |

Supplementary Table 4

| ID                        | First Author                 | Year             | Country        | N             | Survey location              | Population       | Source           | CBR (2012)  | HbS allele frequency | HbC allele frequency | $F_{IS}^{(%)}$ | HbCC newborn estimate |                     |                          | HbSC newborn estimate |                     |                          |
|---------------------------|------------------------------|------------------|----------------|---------------|------------------------------|------------------|------------------|-------------|----------------------|----------------------|----------------|-----------------------|---------------------|--------------------------|-----------------------|---------------------|--------------------------|
|                           |                              |                  |                |               |                              |                  |                  |             |                      |                      |                | HWE <sup>(1)</sup>    | HWE+ $F_{IS}^{(2)}$ | Ratio <sup>(2)/(1)</sup> | HWE <sup>(1)</sup>    | HWE+ $F_{IS}^{(2)}$ | Ratio <sup>(2)/(1)</sup> |
| <b>Sub-Saharan Africa</b> |                              |                  |                |               |                              |                  |                  |             |                      |                      |                |                       |                     |                          |                       |                     |                          |
| 1                         | McGann                       | 2013             | Angola         | 36,453        | Luanda                       | 1,822,407        | UN               | 44.3        | 0.120                | 0.0004               | 0.62           | 0                     | 0                   | /                        | 7                     | 7                   | 1.0                      |
| 2                         | Kafando                      | 2005             | Burkina Faso   | 2,341         | Ouagadougou                  | 1,475,223        | UN               | 41.1        | 0.048                | 0.1038               | 5.45           | 653                   | 961                 | 1.5                      | 608                   | 574                 | 0.9                      |
| 10                        | Mutesa                       | 2007             | DRC            | 84            | Goma                         | 1,000,000        | Wikipedia        | 42.9        | 0.024                | 0.0119               | -2.86          | 6                     | -8                  | -1.3                     | 24                    | 25                  | 1.0                      |
| 25                        | Ohene-Frempong               | <i>Pers.com.</i> | Ghana          | 343,355       | Kumasi                       | 1,922,130        | UN               | 31.1        | 0.080                | 0.0529               | 3.92           | 167                   | 285                 | 1.7                      | 507                   | 487                 | 1.0                      |
| 27                        | Diallo                       | 2008             | Mali           | 1,025         | Bamako                       | 2,037,000        | CIA              | 47.3        | 0.055                | 0.0598               | 2.55           | 344                   | 482                 | 1.4                      | 638                   | 622                 | 1.0                      |
| 28                        | Kulkarni                     | 1986             | Nigeria        | 700           | Kaduna                       | 1,524,000        | CIA              | 41.5        | 0.127                | 0.0121               | 10.00          | 9                     | 85                  | 9.4                      | 195                   | 176                 | 0.9                      |
| 29                        | Odunvbun                     | 2008             | Nigeria        | 644           | Benin City                   | 1,147,188        | UN               | 41.5        | 0.132                | 0.0062               | 8.71           | 2                     | 27                  | /                        | 78                    | 71                  | 0.9                      |
| 31                        | Mutesa                       | 2007             | Rwanda         | 1,104         | Kigali & Butare              | 740,383          | UN               | 35.4        | 0.014                | 0.0009               | 4.95           | 0                     | 1                   | /                        | 1                     | 1                   | 1.0                      |
| 32                        | Oudart                       | 1968             | Senegal        | 345           | Dakar                        | 1,056,009        | UN               | 38.1        | 0.042                | 0.0087               | 7.40           | 3                     | 29                  | 9.7                      | 29                    | 27                  | 0.9                      |
| 33                        | Mbodji                       | 2003             | Senegal        | 479           | Dakar                        | 1,056,009        | Census           | 38.1        | 0.059                | 0.0063               | 25.69          | 2                     | 66                  | 33.0                     | 30                    | 22                  | 0.7                      |
| 34                        | Tchamago                     | 2006             | Senegal        | 944           | Dakar (CHAN & HPD)           | 1,056,009        | UN               | 38.1        | 0.052                | 0.0048               | 5.87           | 1                     | 12                  | 12.0                     | 20                    | 19                  | 1.0                      |
| 39                        | North                        | 1988             | Togo           | 385           | Lomé                         | 1,524,000        | CIA              | 36.7        | 0.110                | 0.0532               | -0.99          | 159                   | 131                 | 0.8                      | 658                   | 664                 | 1.0                      |
| 40                        | Segbena                      | 2002             | Togo           | 171           | Lomé                         | 1,524,000        | CIA              | 36.7        | 0.105                | 0.0906               | -3.26          | 460                   | 309                 | 0.7                      | 1067                  | 1,102               | 1.0                      |
| <b>North Africa</b>       |                              |                  |                |               |                              |                  |                  |             |                      |                      |                |                       |                     |                          |                       |                     |                          |
| 42                        | Fattoum                      | 2006             | Tunisia        | 2,029         | Tunis                        | 702,330          | UN               | 17.3        | 0.011                | 0.0042               | -1.22          | 0                     | 0                   | /                        | 1                     | 1                   | /                        |
| 43                        | Fattoum                      | 2006             | Tunisia        | 335           | Nabeul                       | 56,387           | Wikipedia        | 17.3        | 0.003                | 0.0015               | -0.35          | 0                     | 0                   | /                        | 0                     | 0                   | /                        |
|                           | <b>Fattoum<sup>z</sup></b>   | <b>2006</b>      | <b>Tunisia</b> | <b>2,628</b>  | <b>Tunis + Nabeul + Béja</b> | <b>865,158</b>   | <b>Sum</b>       | <b>17.3</b> | <b>0.012</b>         | <b>0.0034</b>        | <b>-1.25</b>   | <b>0</b>              | <b>0</b>            | <b>/</b>                 | <b>1</b>              | <b>1</b>            | <b>/</b>                 |
| 45                        | Hajer                        | 2012             | Tunisia        | 9,148         | Tunis                        | 702,330          | UN               | 17.3        | 0.010                | 0.0021               | 1.32           | 0                     | 0                   | /                        | 1                     | 0                   | 0.0                      |
| <b>Middle East</b>        |                              |                  |                |               |                              |                  |                  |             |                      |                      |                |                       |                     |                          |                       |                     |                          |
| 50                        | Khoriaty                     | 2014             | Lebanon        | 10,095        | Countrywide                  | 5,882,562        | CIA              | 13.5        | 0.009                | 0.0003               | 9.93           | 0                     | 2                   | /                        | 0                     | 0                   | /                        |
| 57                        | Al Hosani                    | 2005             | UAE            | 9,165         | UAE (citizens)               | 1,400,000        | Wikipedia        | 14.8        | 0.008                | 0.0002               | 7.14           | 0                     | 0                   | /                        | 0                     | 0                   | /                        |
| 58                        | Al Hosani                    | 2005             | UAE            | 13,035        | UAE (non-citizens)           | 7,800,000        | Wikipedia        | 14.8        | 0.004                | 0.0004               | 6.33           | 0                     | 3                   | /                        | 0                     | 0                   | /                        |
|                           | <b>Al Hosani<sup>z</sup></b> | <b>2005</b>      | <b>UAE</b>     | <b>22,200</b> | <b>UAE</b>                   | <b>9,200,000</b> | <b>Wikipedia</b> | <b>14.8</b> | <b>0.006</b>         | <b>0.0003</b>        | <b>6.84</b>    | <b>0</b>              | <b>3</b>            | <b>/</b>                 | <b>0</b>              | <b>0</b>            | <b>/</b>                 |
| 59                        | Al Hosani                    | 2014             | UAE            | 542,286       | UAE                          | 9,200,000        | Wikipedia        | 14.8        | 0.005                | 0.0001               | 8.13           | 0                     | 1                   | /                        | 0                     | 0                   | /                        |

## 1 Supplementary Code

```
2 library(fmsb)
3 library(calibrate)
4
5 # Radarchartcentre function (adapted from the radarchart function in the fmsb package)
6
7 #####
8 radarchartcentre <- function (df, axistype = 0, seg = 4, pty = 16, pcol = 1:8, plty = 1:6,
9     plwd = 1, pdensity = NULL, pfc col = NA, cglty = 3, cglwd = 1,
10     cglcol = "navy", axislabcol = "blue", title = "", subtitle = "", size = "", maxmin = TRUE,
11     na.itp = TRUE, ...)
12 {
13   if (!is.data.frame(df)) {
14     cat("The data must be given as dataframe.\n")
15     return()
16   }
17   if ((n <- length(df)) < 3)
18     return()
19   if (maxmin == FALSE) {
20     dfmax <- apply(df, 2, max)
21     dfmin <- apply(df, 2, min)
22     df <- rbind(dfmax, dfmin, df)
23   }
24   plot(c(-1.2, 1.2), c(-1.2, 1.2), type = "n", frame.plot = FALSE,
25     axes = FALSE, xlab = "", ylab = "", main = title, asp = 1)
26   mtext(subtitle, side=3, cex=0.5, font=3)
27   legend(-1.5, 1.4, c("Obs.", "Exp."), lty=c(1,1), lwd=c(2,2), col=c("#ff000099", "#0000ff70"), cex=0.8, bty="n")
28   legend(0.1, 1.4, paste("n=", size), cex=0.9, bty="n")
29
30   theta <- seq(90, 450, length = n + 1) * pi/180
31   theta <- theta[1:n]
32   xx <- cos(theta)
33   yy <- sin(theta)
34   points(0,0, pch=20, cex=0.5, pty = cglty, col = cglcol)
35   for (i in 0:seg) {
36     polygon(xx * (i + 1)/(seg + 1), yy * (i + 1)/(seg + 1), lty = cglty, lwd = cglwd, border = cglcol)
37
38     if (axistype == 1 | axistype == 3)
39       text(-0.05, (i + 1)/(seg + 1), paste(i/seg * 100, "%"), col = axislabcol)
40
41     if (axistype == 4 | axistype == 5)
42       text(-0.05, (i + 1)/(seg + 1), sprintf("%3.2f", i/seg), col = axislabcol)
43   }
44
45   arrows(0, 0, xx*1, yy * 1, lwd = cglwd, lty = cglty, length = 0, col = cglcol)
46   if (axistype == 2 | axistype == 3 | axistype == 5) {
47     text(xx[1:n], yy[1:n], df[1, 1:n], col = axislabcol)
48   }
49   text(xx * 1.2, yy * 1.2, colnames(df), cex=0.85)
50   series <- length(df[[1]])
51   if (length(pty) < (series - 2)) {
52     ptys <- rep(pty, series - 2)
53     pcols <- rep(pcol, series - 2)
54     pltys <- rep(plty, series - 2)
55     plwds <- rep(plwd, series - 2)
```

```

1  pdensities <- rep(pdensity, series - 2)
2  pfcols <- rep(pfcol, series - 2)
3  }
4  else {
5    ptys <- pty
6    pcols <- pcol
7    pltys <- plty
8    plwds <- plwd
9    pdensities <- pdensity
10   pfcols <- pfcol
11  }
12  for (i in 3:series) {
13    xxs <- xx
14    yys <- yy
15    scale <- (df[i, ] - df[2, ])/(df[1, ] - df[2, ])
16
17    if (sum(!is.na(df[i, ])) < 3) {
18      cat(sprintf("[DATA NOT ENOUGH] at %d\n%g\n", i, df[i,
19                ]))
20    }
21    else {
22      for (j in 1:n) {
23        if (is.na(df[i, j])) {
24          if (na.itp) {
25            left <- ifelse(j > 1, j - 1, n)
26            while (is.na(df[i, left])) {
27              left <- ifelse(left > 1, left - 1, n)
28            }
29            right <- ifelse(j < n, j + 1, 1)
30            while (is.na(df[i, right])) {
31              right <- ifelse(right < n, right + 1, 1)
32            }
33            xxleft <- xx[left] + (df[i,left] - df[2, left])/(df[1, left] - df[2,left])
34            yyleft <- yy[left] + (df[i,left] - df[2, left])/(df[1, left] - df[2,left])
35            xxright <- xx[right] + (df[i,right] - df[2, right])/(df[1, right] - df[2, right])
36            yyright <- yy[right] + (df[i,right] - df[2, right])/(df[1, right] - df[2, right])
37
38
39            if (xxleft > xxright) {
40              xxtmp <- xxleft
41              yytmp <- yyleft
42              xxleft <- xxright
43              yyleft <- yyright
44              xxright <- xxtmp
45              yyright <- yytmp
46            }
47            xxs[j] <- xx[j] * (yyleft * xxright - yyright * xxleft)/(yy[j]*(xxright - xxleft) - xx[j] * (yyright - yyleft))
48            yys[j] <- (yy[j]/xx[j]) * xxs[j]
49          }
50        }
51      else {
52        xxs[j] <- 0
53        yys[j] <- 0
54      }
55    }
56  else {
57    xxs[j] <- xx[j] * ((df[i, j] - df[2, j])/(df[1, j] - df[2, j]))

```

```

1     vys[j] <- yy[j] * ((df[i, j] - df[2, j])/(df[1, j] - df[2, j]))
2     }
3     }
4     polygon(xxs, yys, lty = pltys[i - 2], lwd = plwds[i - 2], border = pcols[i - 2], density = pdensities[i - 2], col = pcols[i - 2])
5     points(xx * scale, yy * scale, pch = ptys[i - 2], col = pcols[i - 2])
6     }
7     }
8     }
9
10    #####
11
12    # Import and prepare data
13
14    mydata <- read.csv("Filename.csv", header = T)
15
16    myrownames <- mydata[,1]
17
18    mysize <- mydata$N
19
20    myyear <- mydata$Year
21
22    myauthor <- mydata$Author
23
24    mydata <- mydata[,2:7]
25
26    mydata <- data.frame(round(mydata))
27
28    # Create plots
29
30    pdf("Filename.pdf", paper="a4", onefile=T, height=10.5, width=8)
31
32    par(mfrow=c(6,5), mar=c(0.1,0.1,3,0.1))
33
34    for (i in c(1:(nrow(mydata)/2))) {
35      maxmin <- data.frame(
36        AA = c(max(mydata[i,1], mydata[i+(nrow(mydata)/2),1]), 0),
37        AS = c(max(mydata[i,2], mydata[i+(nrow(mydata)/2),2]), 0),
38        SS = c(max(mydata[i,3], mydata[i+(nrow(mydata)/2),3]), 0),
39        AC = c(max(mydata[i,4], mydata[i+(nrow(mydata)/2),4]), 0),
40        SC = c(max(mydata[i,5], mydata[i+(nrow(mydata)/2),5]), 0),
41        CC = c(max(mydata[i,6], mydata[i+(nrow(mydata)/2),6]), 0)
42      )
43      colnames(mydata) <- c("AA", "AS", "SS", "AC", "SC", "CC")
44      myinput <- rbind(maxmin, mydata[i,1:6], mydata[i+(nrow(mydata)/2),1:6])
45      radarchartcentre(myinput, maxmin=T, seg = 3, title=myrownames[i], subtitle= paste(myauthor[i], "(" , myyear[i], ")"),
46        size=mysize[i], mar=c(0,0,0,0),
47        pty=32, pcol=c("#ff000099", "#0000ff70"), plwd=2, plty=1,
48        cglcol="light grey", cglty=1)
49    }
50    dev.off()

```
